# Supplementary material for: A nile red-based near-infrared fluorescent probe for endogenous hydrogen polysulfides in living cells
Source: Royal Society of Chemistry journal article supplement (doi:10.1039/c7ay02376f), 2017-01-01
Supplement: c7ay02376f1.pdf [file c7ay02376f1.pdf]

**Supporting Information for**

**A Nile Red-based Near-infrared Fluorescent Probe for Endogenous Hydrogen  
Polysulfides in Living Cells**

Kai-Bin Li,<sup>#</sup> Feng-Zao Chen,<sup>#</sup> Siqi Zhang, Wei Shi, De-Man Han\*, Chen Cai, Cai-Xia Chen

Department of Chemistry, Taizhou University, Jiaojiang, 318000, China

**Contents list:**

- S1. Additional Figures
- S2. Generation of reactive nitrogen and oxygen species (RNS / ROS)
- S3. Original spectral copy of new compounds
- S4. The procedure for the preparation of Na<sub>2</sub>S<sub>2</sub> and Na<sub>2</sub>S<sub>4</sub>

## S1. Additional Figures

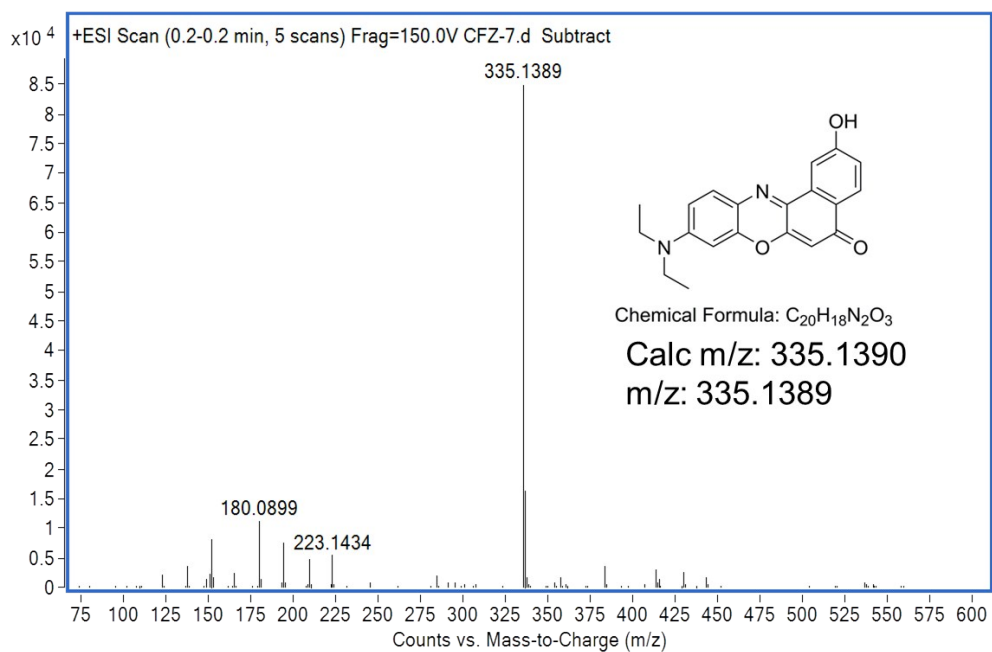

**Fig. S1.** HR-MS of the product of KB1+Na<sub>2</sub>S<sub>2</sub>

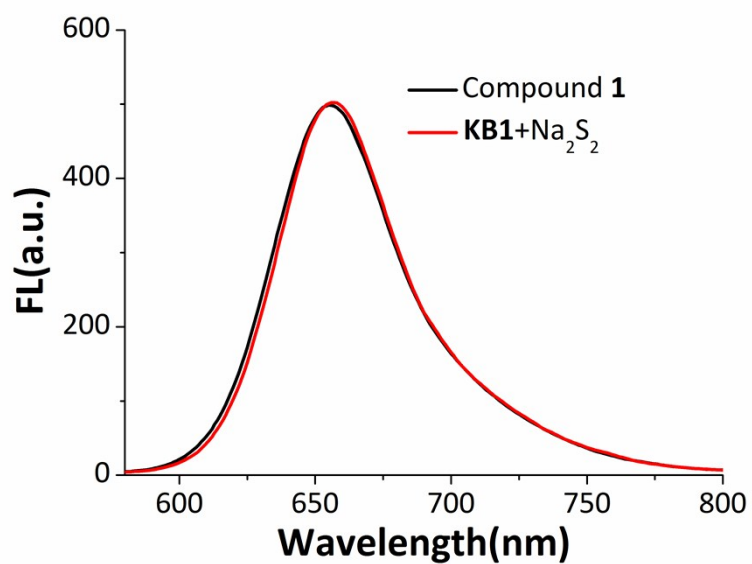

**Fig. S2.** Fluorescence spectra of compound **1** (5  $\mu$ M) and KB1+Na<sub>2</sub>S<sub>2</sub> (5  $\mu$ M)

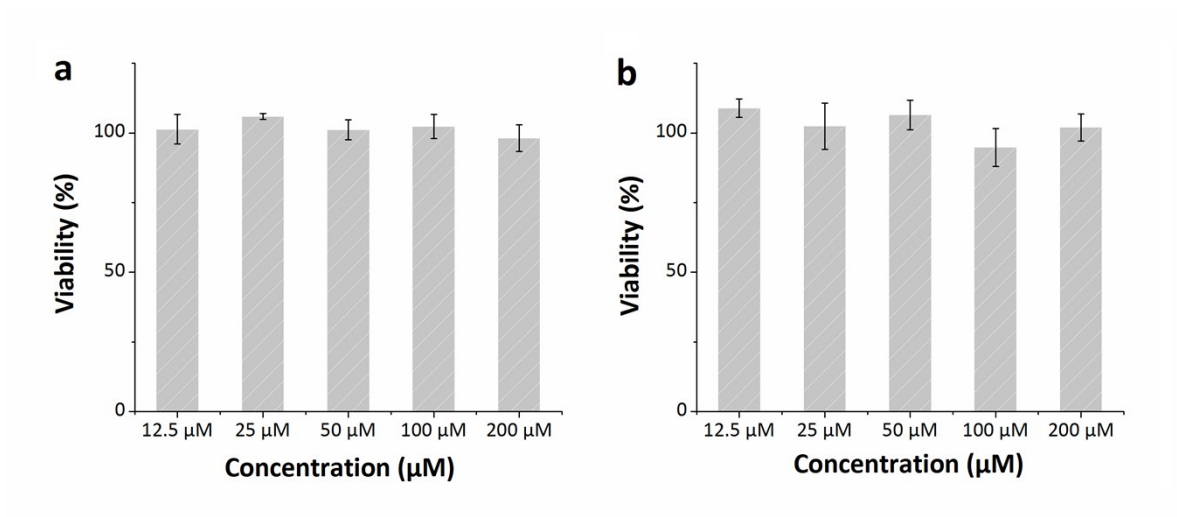

**Fig. S3.** Cell viability of (a) MCF-7 and (b) HeLa cells in the presence of **KB1** with indicated concentration determined by MTS

## **S2. Generation of reactive nitrogen and oxygen species (RNS / ROS)**

**ONOO<sup>-</sup>**: The synthesis of peroxynitrite involved nitrosation of H<sub>2</sub>O<sub>2</sub> at pH ≥12.0 by isoamyl nitrite (CAS: 110-46-3).

**NO**: Nitric oxide was generated from SNP (Sodium Nitroferricyanide (III) Dihydrate, CAS: 13755-38-9).

**ClO<sup>-</sup>**: NaClO was dissolved in deionized water.

**H<sub>2</sub>O<sub>2</sub>**: H<sub>2</sub>O<sub>2</sub> was dissolved in deionized water.

**·OH**: Hydroxyl radicals were generated by the addition of Fe<sup>2+</sup> and H<sub>2</sub>O<sub>2</sub> in 10 mM HEPES buffer (pH 7.4).

**<sup>1</sup>O<sub>2</sub>**: <sup>1</sup>O<sub>2</sub> was generated by hydrogen peroxide/sodium hypochlorite system.

**O<sub>2</sub><sup>-</sup>**: O<sub>2</sub><sup>-</sup> was generated by xanthine and xanthine oxidase. Xanthine oxidase was added first. After xanthine oxidase was dissolved, xanthine was added and the mixtures were stirred at 25 °C for 1 h.

### S3. Original spectral copy of new compounds

#### <sup>1</sup>H NMR of KB1:

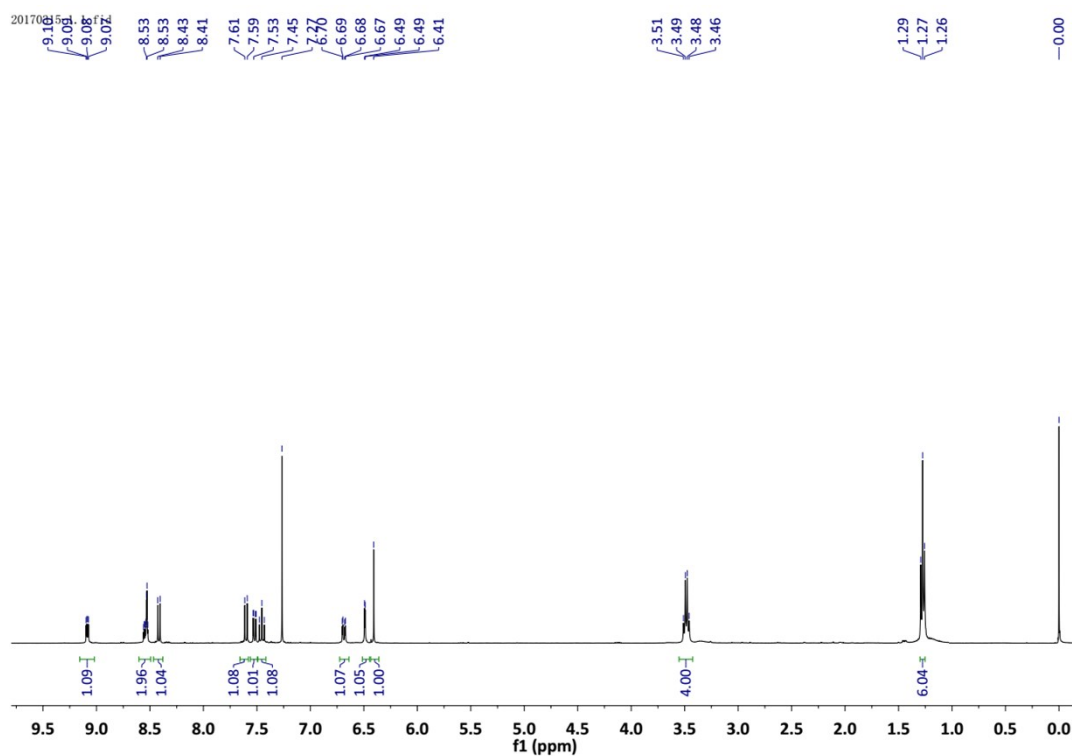

#### <sup>13</sup>C NMR of KB1:

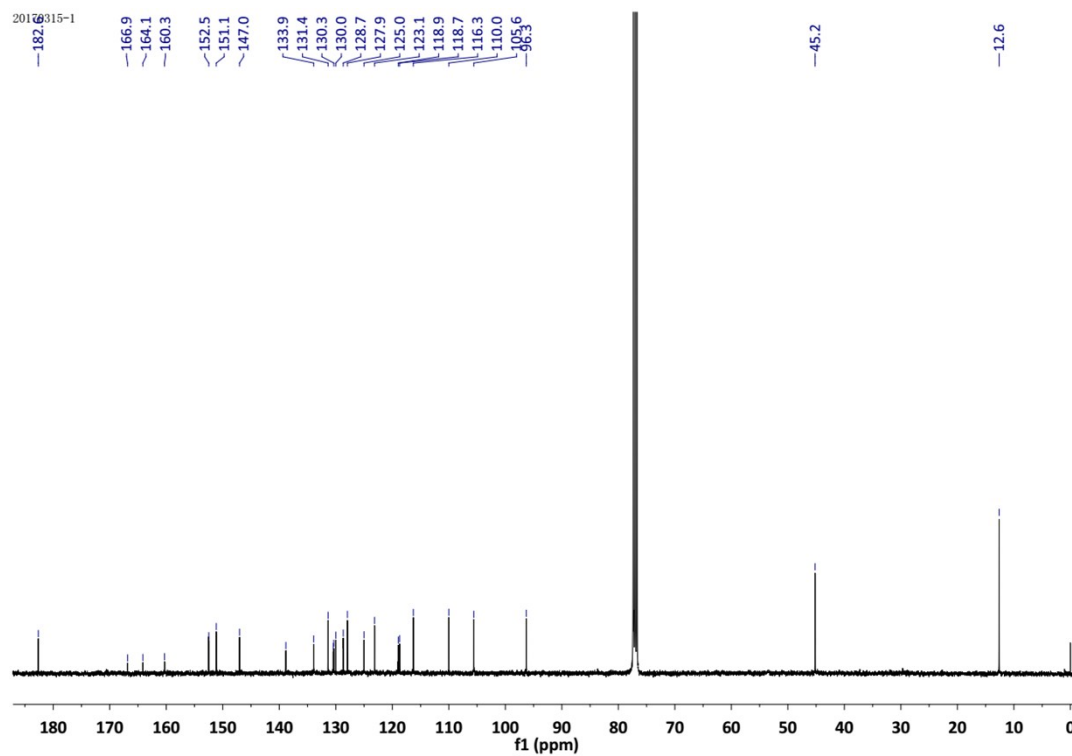

## HR-ESI-MS of KB1

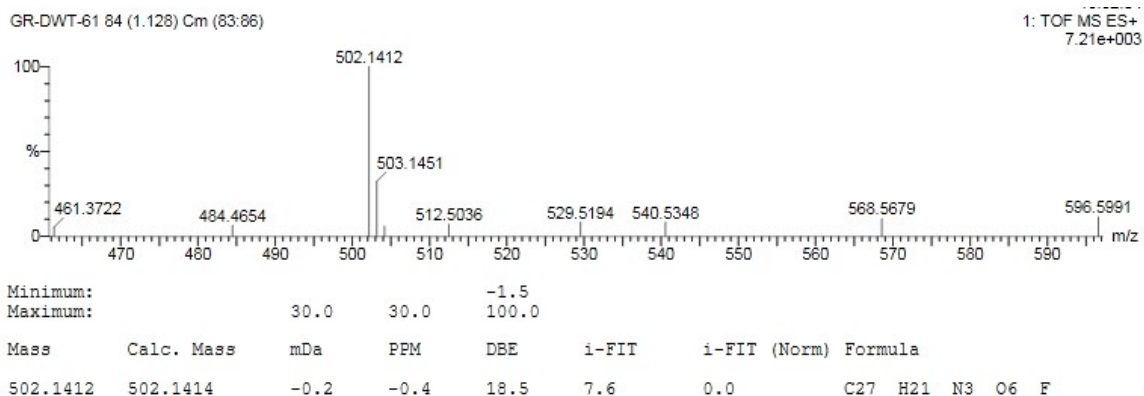

### S4. The procedure for the preparation of Na<sub>2</sub>S<sub>2</sub> and Na<sub>2</sub>S<sub>4</sub>

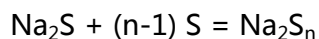

To a solution of sodium sulfide (0.78 g, 0.01 mmol) and sulfur (0.32 g, 0.01 mmol) in distilled water (100 mL), the mixture was refluxed for 1h, then 0.1 mol/L of Na<sub>2</sub>S<sub>2</sub> solution was obtained. Na<sub>2</sub>S<sub>4</sub> solution was obtained by using the same method with 3 equivalents of sulfur.
